# Supplementary material for: Expansion and collapse of VEGF diversity in major clades of the animal kingdom
Source: bioRxiv or medRxiv preprint supplement (doi:10.1101/2022.09.19.507521), 2023-01-04
Supplement: Supplementary file [file media-1.pdf]

# 1. Primary blast

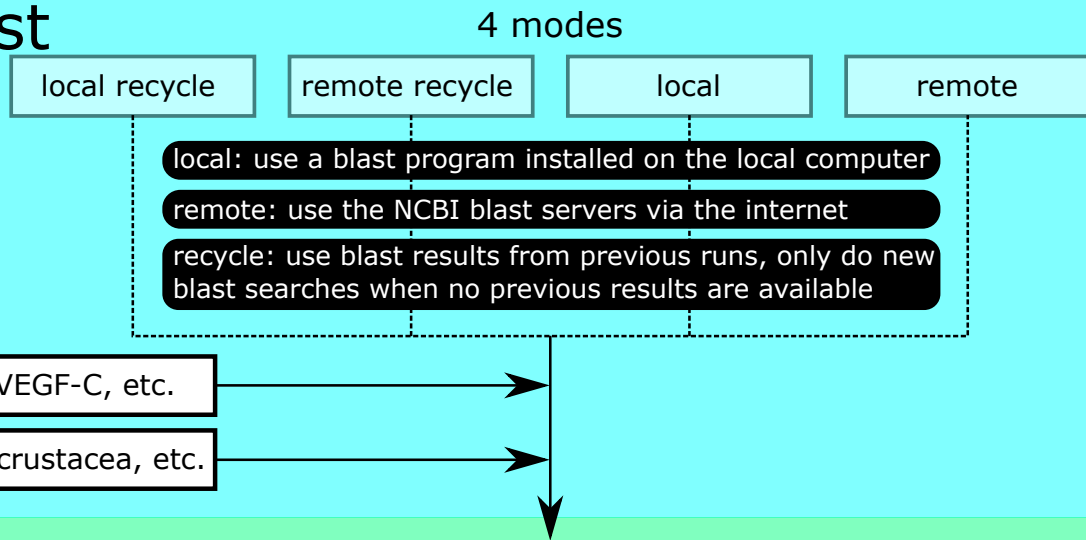

# 2. Analysis

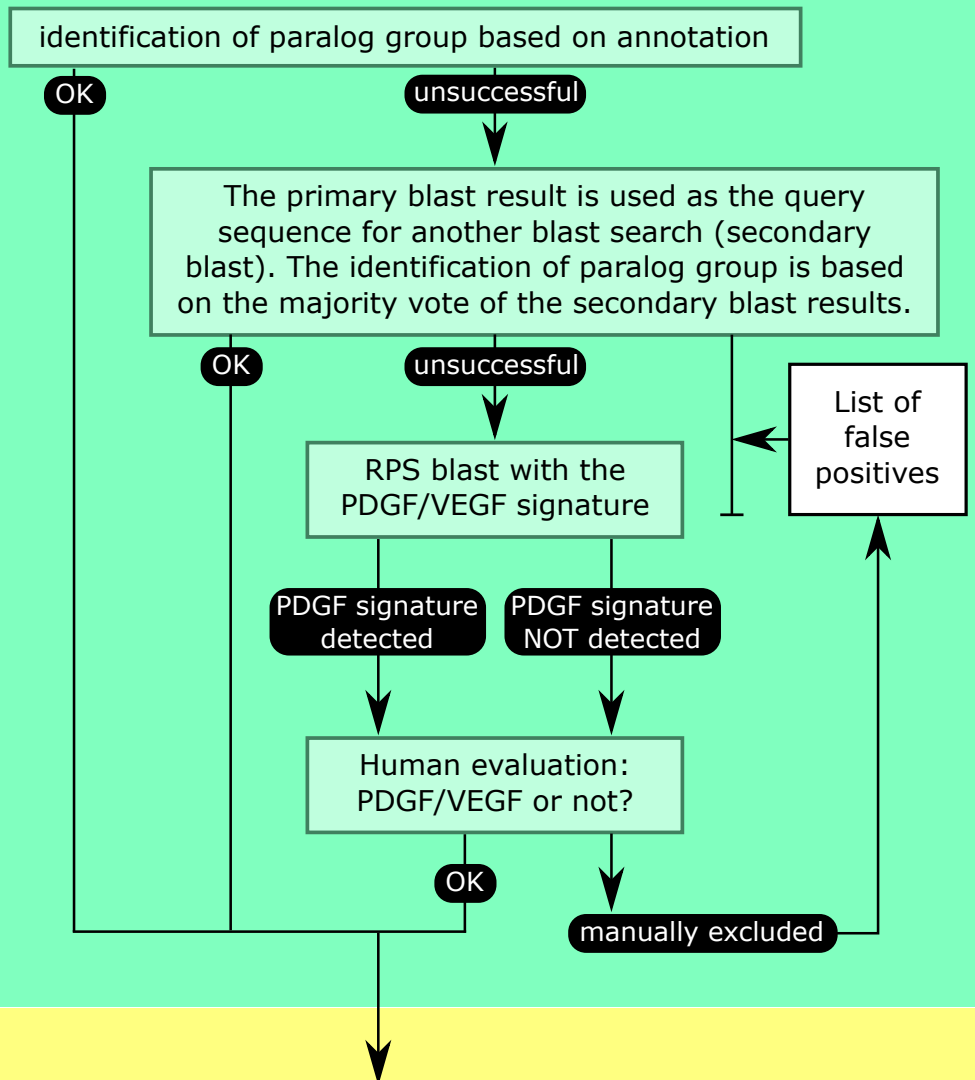

# 3. Make tree

subset from tree of life

All hits of each blast search are

- classified as orthologs, paralogs, or homologs without further classification
- listed along the phylogenetic tree of life in a table, where each column corresponds to one PDGF/VEGF ortholog group
