# Supplementary material for: Expansion and collapse of VEGF diversity in major clades of the animal kingdom
Source: bioRxiv or medRxiv preprint supplement (doi:10.1101/2022.09.19.507521), 2023-01-04
Supplement: Supplementary file [file media-2.pdf]

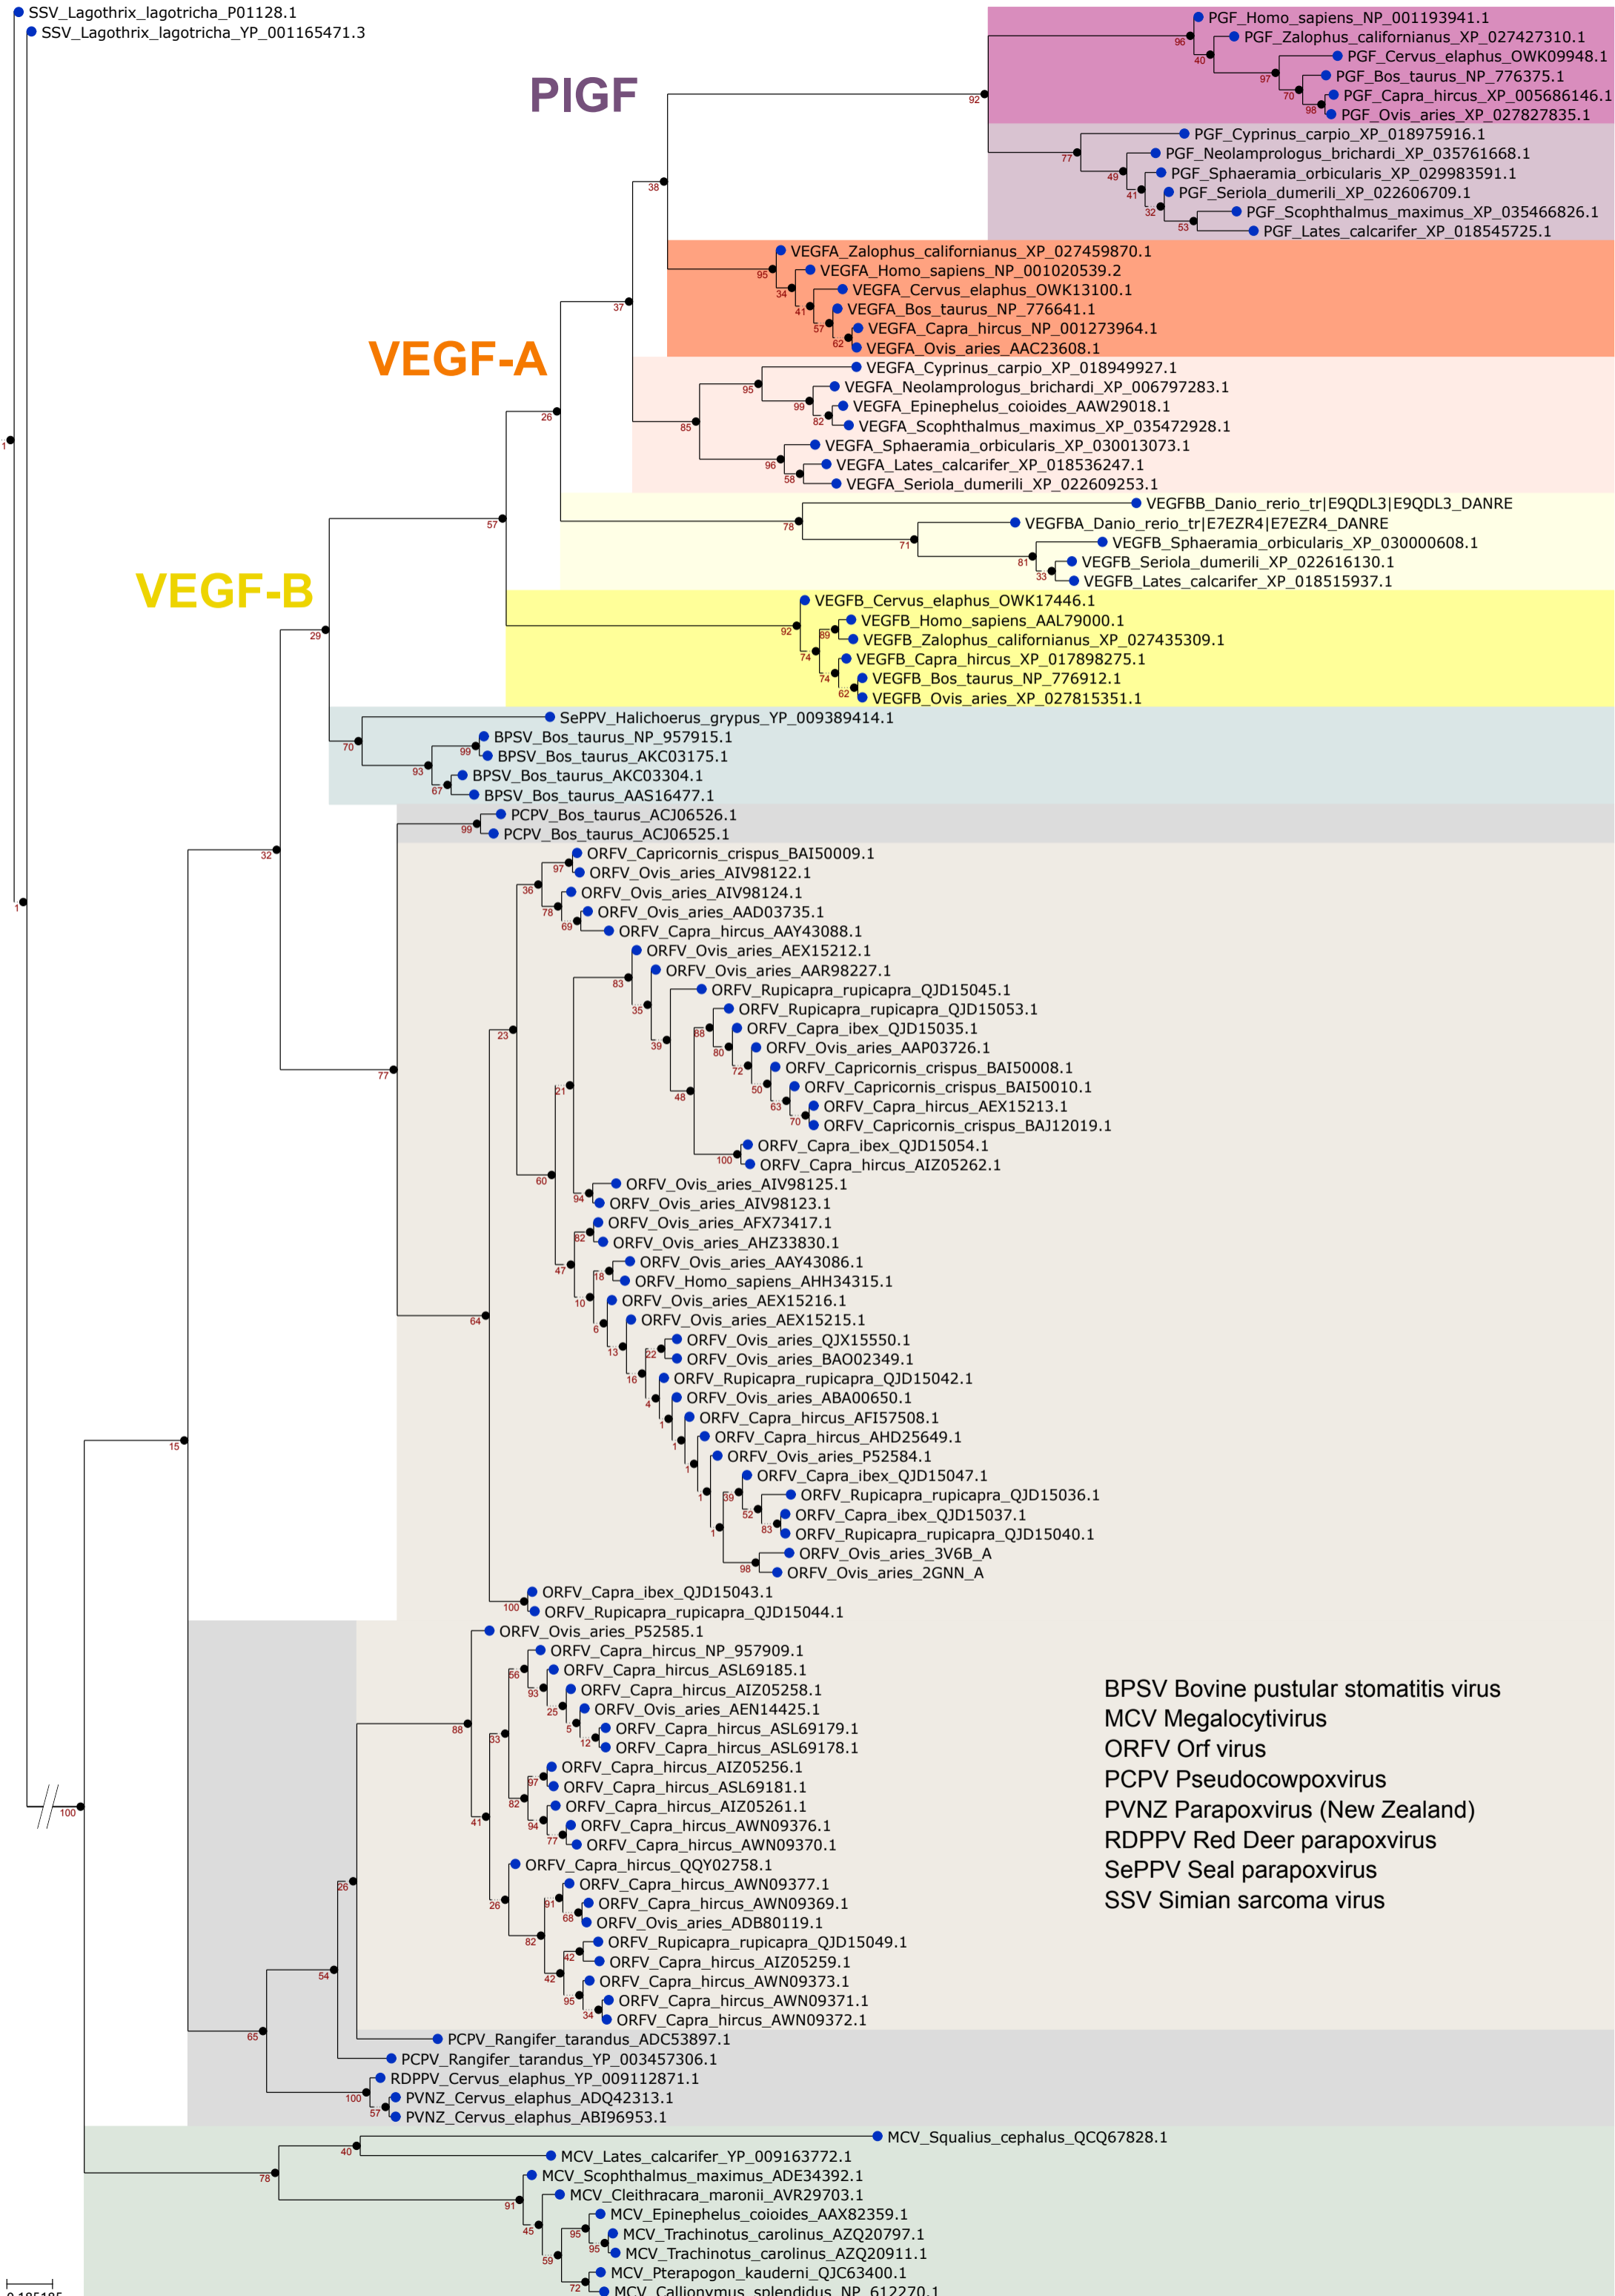

BPSV Bovine pustular stomatitis virus  
 MCV Megalocytivirus  
 ORFV Orf virus  
 PCPV Pseudocowpoxvirus  
 PVNZ Parapoxvirus (New Zealand)  
 RDPPV Red Deer parapoxvirus  
 SePPV Seal parapoxvirus  
 SSV Simian sarcoma virus
