# Supplementary material for: Expansion and collapse of VEGF diversity in major clades of the animal kingdom
Source: bioRxiv or medRxiv preprint supplement (doi:10.1101/2022.09.19.507521), 2023-01-04

• Analysis performed: 190623\_092048

• Analyzed sequences (hits resulting from 676 blast searches, 52 animal groups x 13 query sequences):49992 (out of which unique: 8666, programmatically recognized as VEGF/PDGF family members: 90.5%).

• Red dotted lines in the tree indicate paraphyletic relationships.

• The tree background color indicates the presence of the proteins with the corresponding color according to our hypotheses.

• The red-to-white background of the table indicates a heuristic reliability of the results, where a brighter color indicates a higher reliability. This is calculated using the number of fully sequenced genomes, the number of species in the phylum and the number of protein sequences available for that phylum.

• The numbers in the table denote the number of: orthologs found (black), P = paralog found, ? = homologs found, whose relationship could not be programmatically determined, Σ = total homologs found.

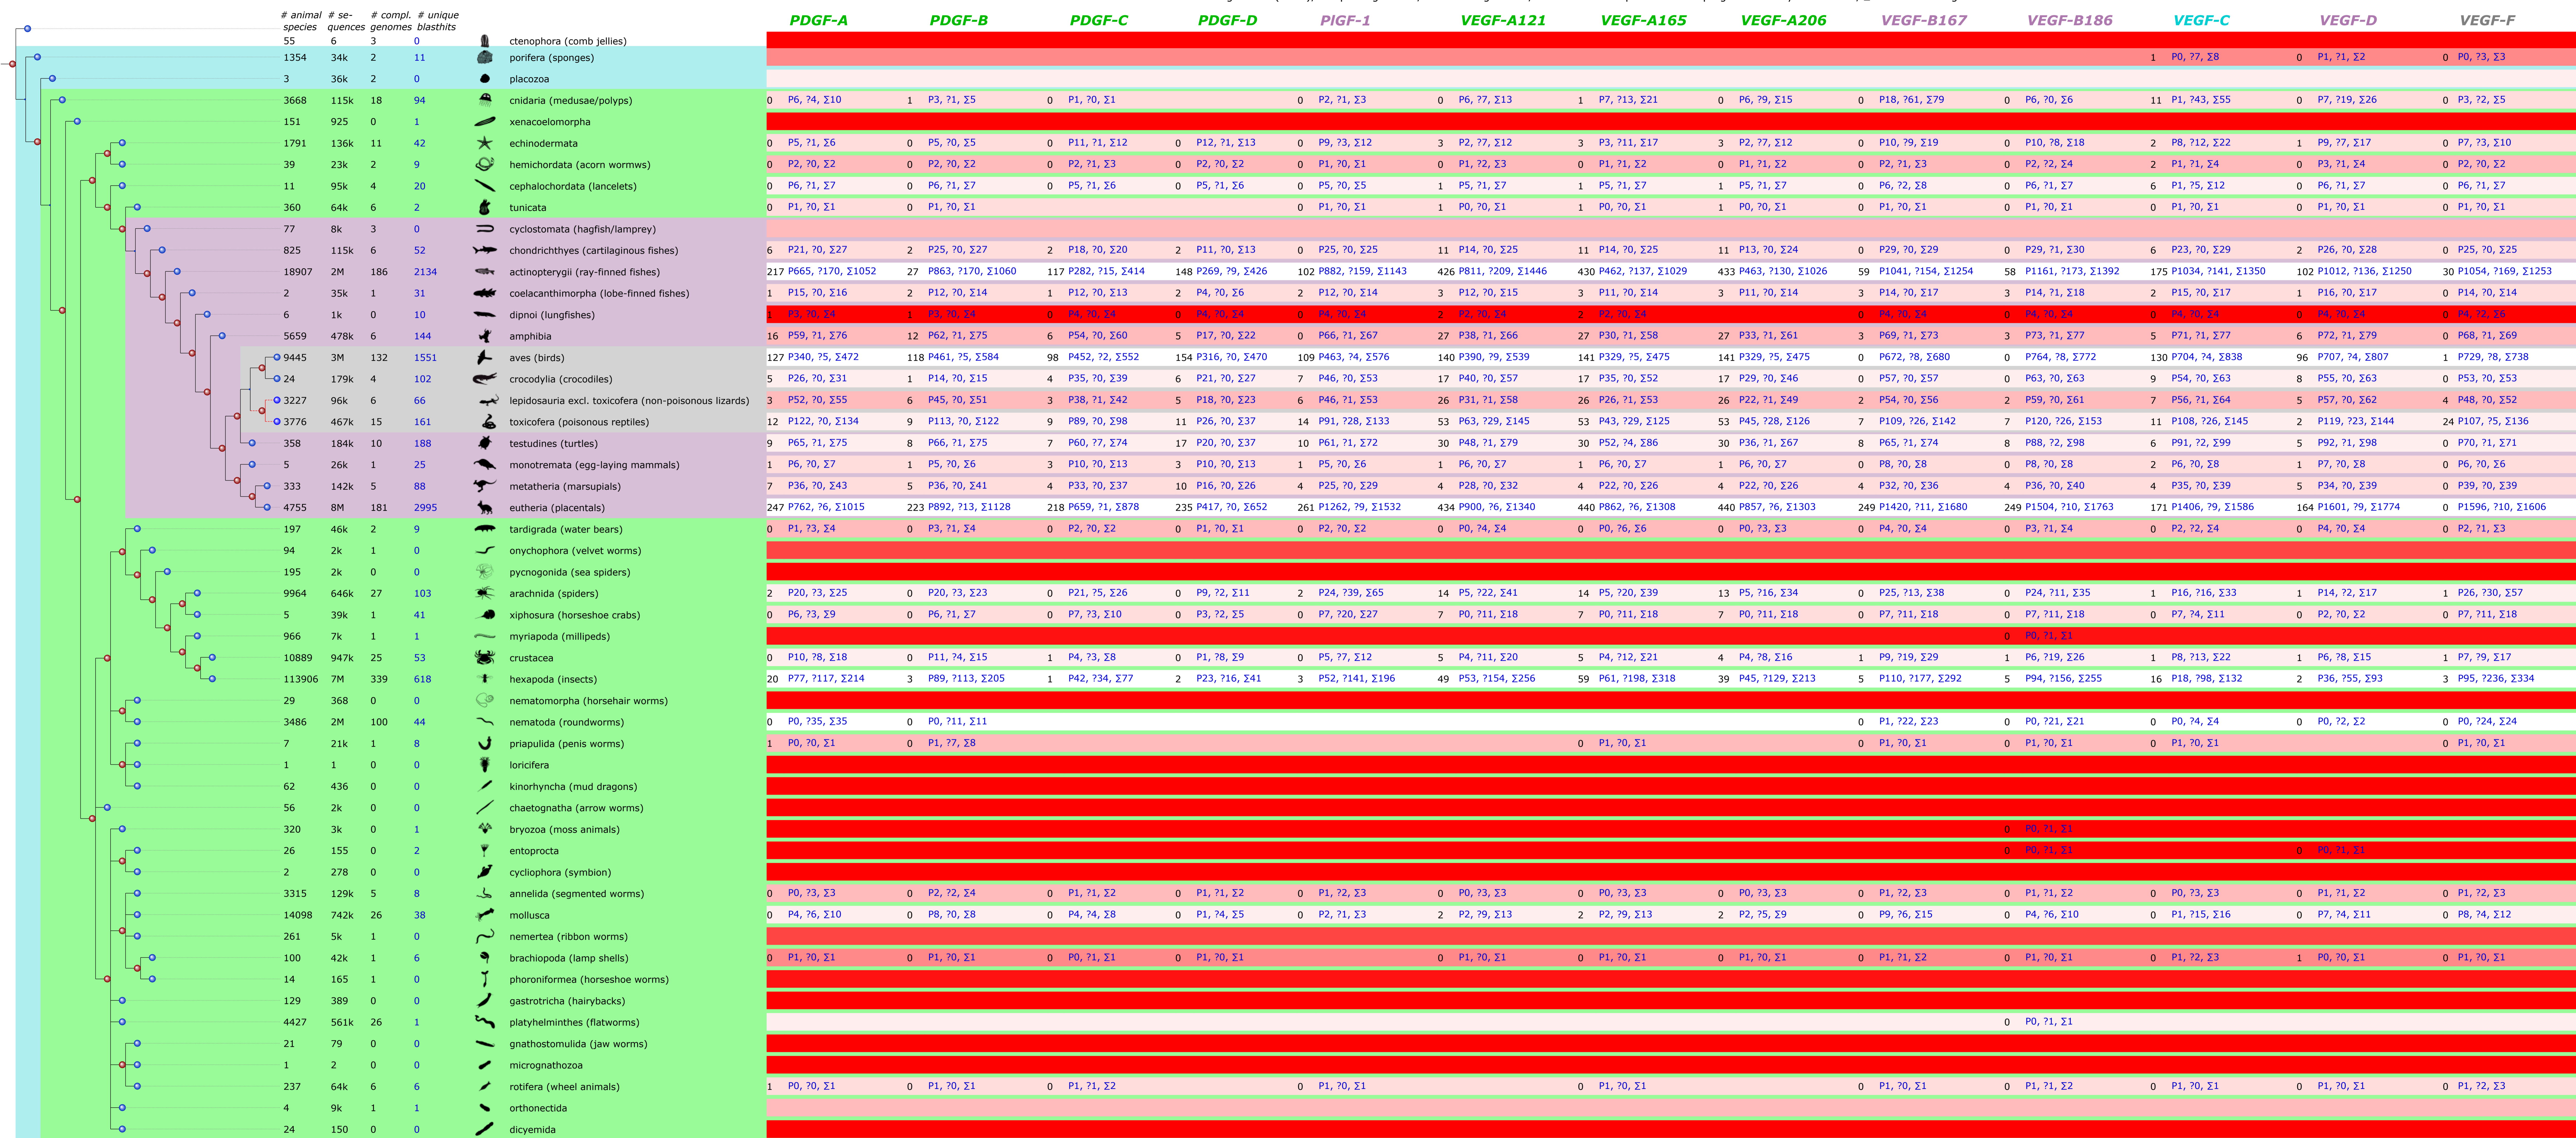

Supplement: Supplementary file [file media-3.pdf]
