# Supplementary material for: Expansion and collapse of VEGF diversity in major clades of the animal kingdom
Source: bioRxiv or medRxiv preprint supplement (doi:10.1101/2022.09.19.507521), 2023-01-04
Supplement: Supplementary file [file media-4.pdf]

**Supplementary Table 2. False-positive BLAST hits of PDGF/VEGF-like sequences from the phylum *Porifera***

| <b>Protein</b>                                                                                      | <b>PDGF signature</b> | <b>Identified as potential ortholog of</b> | <b>Probable true identity</b>             | <b>id/ Accession number</b> | <b>BLASTP link</b>     |
|-----------------------------------------------------------------------------------------------------|-----------------------|--------------------------------------------|-------------------------------------------|-----------------------------|------------------------|
| <a href="#">PREDICTED: balbiani ring protein 3-like [Amphimedon queenslandica]</a>                  | yes                   | VEGF-C                                     | BR3P                                      | 1133448081<br>XP_019849422  | <a href="#">blastp</a> |
| <a href="#">PREDICTED: balbiani ring protein 3-like [Amphimedon queenslandica]</a>                  | no                    | VEGF-C                                     | BR3P                                      | 1133448089<br>XP_019849443  | <a href="#">blastp</a> |
| <a href="#">PREDICTED: uncharacterized protein LOC109580578 [Amphimedon queenslandica]</a>          | no                    | VEGF-C                                     | BR3P-like                                 | 1133448095<br>XP_019849459  | <a href="#">blastp</a> |
| <a href="#">PREDICTED: balbiani ring protein 3-like [Amphimedon queenslandica]</a>                  | no                    | VEGF-C                                     | BR3P                                      | 1133448093<br>XP_019849450  | <a href="#">blastp</a> |
| <a href="#">PREDICTED: uncharacterized protein LOC109580550 [Amphimedon queenslandica]</a>          | no                    | VEGF-C                                     | BR3P-like                                 | 1133448077<br>XP_019849413  | <a href="#">blastp</a> |
| <a href="#">PREDICTED: vegetative cell wall protein gp1-like [Amphimedon queenslandica]</a>         | no                    | VEGF-C                                     | vegetative cell wall protein gp1-like     | 1133448083<br>XP_019849427  | <a href="#">blastp</a> |
| <a href="#">PREDICTED: collagen alpha-1(III) chain-like [Amphimedon queenslandica]</a>              | no                    | VEGF-C                                     | collagen-like                             | 1133448097<br>XP_019849466  | <a href="#">blastp</a> |
| <a href="#">cadherin 1 [Oscarella pearsei]</a>                                                      | no                    | VEGF-C                                     | cadherin                                  | 1495972496<br>AYN71348      | <a href="#">blastp</a> |
| <a href="#">PREDICTED: uncharacterized protein LOC109587577, partial [Amphimedon queenslandica]</a> | no                    | VEGF-F                                     | myosin-like                               | 1133481770<br>XP_019859367  | <a href="#">blastp</a> |
| <a href="#">PREDICTED: origin recognition complex subunit 1-like [Amphimedon queenslandica]</a>     | no                    | VEGF-F                                     | origin recognition complex subunit 1-like | 1133447571<br>XP_019857763  | <a href="#">blastp</a> |
| <a href="#">PREDICTED: mismatch repair endonuclease PMS2-like [Amphimedon queenslandica]</a>        | no                    | VEGF-F                                     | endonuclease                              | 1133468780<br>XP_019854585  | <a href="#">blastp</a> |
