# Supplementary material for: Expansion and collapse of VEGF diversity in major clades of the animal kingdom
Source: bioRxiv or medRxiv preprint supplement (doi:10.1101/2022.09.19.507521), 2023-01-04
Supplement: Supplementary file [file media-5.pdf]

**Supplementary Table 3. Fish mRNA transcript contigs.**

| Common name             | Scientific name                 | clade             | most recent genome duplication | code | number of contigs | Number of different transcripts (mRNA contigs) |        |        |        |       |       |        |        |      |      |        |        |       |       | mis-classified | total | check |
|-------------------------|---------------------------------|-------------------|--------------------------------|------|-------------------|------------------------------------------------|--------|--------|--------|-------|-------|--------|--------|------|------|--------|--------|-------|-------|----------------|-------|-------|
|                         |                                 |                   |                                |      |                   | PDGFAA                                         | PDGFAB | PDGFBA | PDGFBB | PDGFC | PDGFD | VEGFAA | VEGFAB | PGFA | PGFB | VEGFBA | VEGFBB | VEGFC | VEGFD |                |       |       |
| Bowfin                  | <i>Amia calva</i>               | Amiiformes        | VGD2                           | AAC  | 35064             | 0                                              | 1      | 0      | 1      | 1     | 1     | 3      | 0      | 0    | 1    | 1      | 0      | 2     | 1     | 0              | 12    | 12    |
| Spotted gar             | <i>Lepisosteus oculatus</i>     | Lepisosteiformes  | VGD2                           | BLO  | 41396             | 0                                              | 1      | 0      | 1      | 1     | 1     | 1      | 0      | 0    | 1    | 2      | 0      | 1     | 1     | 1              | 11    | 11    |
| European eel            | <i>Anguilla anguilla</i>        | Anguilliformes    | TGD                            | DAA  | 60263             | 1                                              | 1      | 0      | 0      | 2     | 1     | 3      | 0      | 0    | 1    | 2      | 0      | 3     | 1     | 0              | 15    | 15    |
| Butterfly fish          | <i>Pantodon buchholzi</i>       | Osteoglossiformes | TGD                            | C2PB | 44577             | 1                                              | 2      | 1      | 1      | 2     | 1     | 3      | 0      | 0    | 1    | 3      | 0      | 3     | 1     | 0              | 19    | 19    |
| Arowana                 | <i>Osteoglossum bicirrhosum</i> | Osteoglossiformes | TGD                            | COB  | 55739             | 1                                              | 2      | 1      | 1      | 2     | 3     | 2      | 2      | 0    | 1    | 1      | 0      | 3     | 1     | 0              | 20    | 20    |
| Elephantnose fish       | <i>Ghnathonemus petersi</i>     | Osteoglossiformes | TGD                            | B2GP | 53423             | 1                                              | 1      | 0      | 1      | 2     | 1     | 1      | 2      | 0    | 1    | 4      | 0      | 2     | 1     | 1              | 18    | 18    |
| Aliss shad              | <i>Alosa alosa</i>              | Clupeiformes      | TGD                            | EAA  | 53363             | 1                                              | 1      | 1      | 0      | 0     | 1     | 2      | 3      | 0    | 1    | 1      | 0      | 3     | 0     | 1              | 15    | 15    |
| Zebrafish               | <i>Danio rerio</i>              | Cypriniformes     | TGD                            | FDR  | 48158             | 1                                              | 1      | 1      | 1      | 2     | 1     | 2      | 4      | 1    | 1    | 1      | 0      | 1     | 1     | 1              | 19    | 19    |
| Panga                   | <i>Pangasius hypophthalmus</i>  | Siluriformes      | TGD                            | GPH  | 43013             | 2                                              | 0      | 1      | 1      | 1     | 1     | 3      | 3      | 0    | 2    | 2      | 0      | 1     | 4     | 2              | 23    | 23    |
| Black ghost             | <i>Apteronotus albifrons</i>    | Gymnotiformes     | TGD                            | A2AA | 45356             | 1                                              | 1      | 1      | 1      | 1     | 1     | 3      | 3      | 0    | 1    | 1      | 0      | 1     | 1     | 1              | 17    | 17    |
| Mexican tetra (cave)    | <i>Astyanax mexicanus</i>       | Characiformes     | TGD                            | TAM  | 47729             | 1                                              | 1      | 2      | 1      | 1     | 2     | 2      | 3      | 0    | 1    | 1      | 0      | 1     | 2     | 1              | 19    | 19    |
| Mexican tetra (surface) | <i>Astyanax mexicanus</i>       | Characiformes     | TGD                            | SAM  | 46670             | 1                                              | 1      | 2      | 1      | 1     | 2     | 4      | 3      | 0    | 1    | 2      | 0      | 1     | 1     | 1              | 21    | 21    |
| Northern pike           | <i>Esox lucius</i>              | Esociformes       | TGD                            | HEL  | 48567             | 1                                              | 1      | 1      | 0      | 1     | 2     | 1      | 3      | 0    | 2    | 1      | 0      | 2     | 1     | 0              | 16    | 16    |
| Eastern mudminnow       | <i>Umbra pygmae</i>             | Esociformes       | TGD                            | YUP  | 46381             | 1                                              | 1      | 0      | 1      | 1     | 2     | 1      | 3      | 0    | 0    | 1      | 0      | 1     | 1     | 0              | 13    | 13    |
| Grayling                | <i>Thymallus thymallus</i>      | Salmoniformes     | SaGD                           | ITT  | 67157             | 1                                              | 1      | 0      | 0      | 2     | 1     | 2      | 4      | 0    | 0    | 1      | 0      | 2     | 1     | 0              | 15    | 15    |
| European whitefish      | <i>Coregonus lavaretus</i>      | Salmoniformes     | SaGD                           | PCL  | 74701             | 1                                              | 1      | 0      | 1      | 1     | 1     | 1      | 3      | 0    | 1    | 1      | 0      | 2     | 1     | 0              | 14    | 14    |
| American whitefish      | <i>Coregonus clupeaformis</i>   | Salmoniformes     | SaGD                           | UCC  | 66996             | 1                                              | 1      | 0      | 1      | 0     | 2     | 1      | 4      | 0    | 1    | 1      | 0      | 1     | 1     | 1              | 15    | 15    |
| Brown trout             | <i>Salmo trutta</i>             | Salmoniformes     | SaGD                           | NST  | 75338             | 1                                              | 2      | 1      | 1      | 2     | 2     | 1      | 9      | 0    | 0    | 1      | 0      | 1     | 1     | 0              | 22    | 22    |
| Rainbow trout           | <i>Oncorhynchus mykiss</i>      | Salmoniformes     | SaGD                           | D2OM | 78415             | 1                                              | 1      | 0      | 1      | 2     | 1     | 3      | 8      | 0    | 2    | 0      | 0      | 2     | 1     | 0              | 22    | 22    |
| Brook trout             | <i>Salvelinus fontinalis</i>    | Salmoniformes     | SaGD                           | QSF  | 69441             | 1                                              | 1      | 0      | 1      | 1     | 2     | 2      | 3      | 0    | 1    | 2      | 0      | 4     | 1     | 0              | 19    | 19    |
| Sweetfish               | <i>Pecoglossus altivelis</i>    | Osmeriformes      | TGD                            | ZPA  | 47484             | 1                                              | 1      | 1      | 0      | 1     | 1     | 1      | 2      | 0    | 2    | 1      | 0      | 3     | 1     | 1              | 16    | 16    |
| Atlantic cod            | <i>Gadus morhua</i>             | Gadiformes        | TGD                            | KGM  | 50564             | 1                                              | 1      | 0      | 1      | 0     | 0     | 1      | 4      | 0    | 3    | 0      | 0      | 0     | 1     | 0              | 12    | 12    |
| Medaka                  | <i>Oryzias latipes</i>          | Beloniformes      | TGD                            | LOL  | 42186             | 0                                              | 1      | 1      | 1      | 1     | 1     | 0      | 4      | 0    | 1    | 1      | 0      | 2     | 1     | 1              | 15    | 15    |
| European perch          | <i>Perca fluviatilis</i>        | Perciformes       | TGD                            | MPF  | 49204             | 1                                              | 1      | 1      | 1      | 1     | 1     | 1      | 3      | 0    | 2    | 2      | 0      | 2     | 0     | 1              | 17    | 17    |
